# Supplementary material for: Systolic Blood Pressure Trajectories and the Progression of Arterial Stiffness in Chinese Adults
Source: MDPI journal article supplement (doi:10.3390/ijerph191610046), 2022-08-15
Supplement: s1 [file s1]

Association of Blood Pressure Trajectories with Arterial Stiffness Progression

Short title: Blood Pressure Trajectories and arterial stiffness

Supplementary Table S1. Characteristics of participants with and without repeated baPWV measurements.

| Variables                | With repeated baPWV measurements | Without repeated baPWV measurements |
|--------------------------|----------------------------------|-------------------------------------|
| No. of participants      | 14,223                           | 16,161                              |
| Age, years               | 47.8 ± 11.4                      | 49.0 ± 11.7                         |
| Gender, n (%)            |                                  |                                     |
| Male                     | 8,787 (61.8)                     | 10,020 (62.0)                       |
| Female                   | 5,436 (38.2)                     | 6,141 (38.0)                        |
| Education, n (%)         |                                  |                                     |
| Low                      | 521 (3.7)                        | 597 (3.7)                           |
| Intermediate             | 7,916 (55.6)                     | 8,986 (55.6)                        |
| High                     | 5,786 (40.7)                     | 6,578 (40.7)                        |
| Physical activity, n (%) |                                  |                                     |
| Inactive                 | 12,641 (88.9)                    | 14,351 (88.8)                       |
| Active                   | 1,582 (11.1)                     | 1,810 (11.2)                        |
| Smoking, n (%)           |                                  |                                     |
| Never                    | 9,020 (63.4)                     | 1,0262 (63.5)                       |
| Former                   | 779 (5.5)                        | 873 (5.4)                           |
| Current                  | 4,424 (31.1)                     | 5,026 (31.1)                        |
| Drinking, n (%)          |                                  |                                     |
| Never                    | 7,750 (54.5)                     | 8,792 (54.4)                        |
| Former                   | 468 (3.4)                        | 549 (3.4)                           |
| Current                  | 6,005 (42.2)                     | 6,820 (42.2)                        |
| BMI, kg/m <sup>2</sup>   | 24.8 ± 3.4                       | 25.0 ± 3.4                          |
| MAP, mmHg                | 101.6 ± 10.8                     | 103.4 ± 11.3                        |
| FBG, mmol/L              | 5.3 ± 1.2                        | 5.4 ± 1.3                           |
| TC, mmol/L               | 4.9 ± 1.0                        | 4.9 ± 1.0                           |

Abbreviations: BMI, body mass index; MAP, mean arterial pressure; FBG: fasting blood glucose; SBP: systolic blood pressure; TC, total cholesterol.

Continues variables displayed as means ± standard deviation (SD), and categorical variables are displayed as numbers (percentages).

Supplementary Table S2. Associations of SBP trajectories with baseline baPWV stratified by age.

| Trajectory patterns       | No. of participants | Model 1             |         | Model 2             |         |
|---------------------------|---------------------|---------------------|---------|---------------------|---------|
|                           |                     | β (95% CI)          | P-value | β (95% CI)          | P-value |
| Age < 50 years            |                     |                     |         |                     |         |
| Low-stable group          | 4,016               | Ref.                |         | Ref.                |         |
| Moderate-stable group     | 9,162               | 177.0 (168.0-186.0) | <0.001  | 81.1 (70.3-91.9)    | <0.001  |
| Elevated-stable group     | 3,413               | 361.0 (349.9-372.1) | <0.001  | 188.9 (171.8-206.0) | <0.001  |
| Elevated-increasing group | 438                 | 487.3 (454.4-502.3) | <0.001  | 304.0 (278.2-329.8) | <0.001  |
| Elevated-decreasing group | 605                 | 523.8 (503.0-544.5) | <0.001  | 289.3 (259.4-319.1) | <0.001  |
| Age ≥ 50 years            |                     |                     |         |                     |         |
| Low-stable group          | 2,921               | Ref.                |         | Ref.                |         |
| Moderate-stable group     | 5,900               | 199.1 (183.4-214.7) | <0.001  | 139.8 (122.3-157.3) | <0.001  |
| Moderate-increasing group | 1,294               | 438.5 (415.4-461.6) | <0.001  | 318.5 (291.8-345.2) | <0.001  |
| Elevated-decreasing group | 1,957               | 363.2 (343.0-383.4) | <0.001  | 218.7 (187.5-249.9) | <0.001  |
| Elevated-stable group     | 678                 | 541.7 (512.2-571.2) | <0.001  | 348.5 (306.2-390.7) | <0.001  |

Abbreviations:  $\beta$ , indicates regression coefficient; baPWV, brachial-ankle pulse wave velocity; SBP: systolic blood pressure.

Model 1 was unadjusted.

Model 2 was adjusted for age, gender, education level, smoking status, alcohol drinking status, physical activity, BMI, MAP, FBG, and TC.

Supplementary Table S3. Associations of SBP trajectories with baPWV progression stratified by age.

| Trajectory patterns       | No. of participants | Model 1           |         | Model 2           |         |
|---------------------------|---------------------|-------------------|---------|-------------------|---------|
|                           |                     | β (95% CI)        | P-value | β (95% CI)        | P-value |
| Age < 50 years            |                     |                   |         |                   |         |
| Low-stable group          | 1,766               | Ref.              |         | Ref.              |         |
| Moderate-stable group     | 4,457               | 33.6 (26.5-40.8)  | <0.001  | 24.4 (16.7-32.1)  | <0.001  |
| Moderate-increasing group | 2,321               | 62.9 (54.2-71.6)  | <0.001  | 44.1 (34.2-54.1)  | <0.001  |
| Elevated-stable group     | 607                 | 97.0 (84.1-109.9) | <0.001  | 74.0 (46.1-101.9) | <0.001  |
| Elevated-decreasing group | 96                  | 90.0 (63.3-116.7) | <0.001  | 81.0 (66.8-95.1)  | <0.001  |
| Age ≥ 50 years            |                     |                   |         |                   |         |
| Low-stable group          | 983                 | Ref.              |         | Ref.              |         |
| Moderate-stable group     | 2,354               | 22.8 (12.3-33.4)  | <0.001  | 22.7 (11.8-33.7)  | <0.001  |
| Moderate-increasing group | 537                 | 46.1 (26.2-65.9)  | <0.001  | 46.2 (25.7-66.8)  | <0.001  |
| Elevated-decreasing group | 820                 | 43.5 (27.8-59.1)  | <0.001  | 42.6 (26.3-58.8)  | <0.001  |
| Elevated-stable group     | 282                 | 63.4 (39.7-67.1)  | <0.001  | 50.5 (36.1-64.9)  | <0.001  |

Abbreviations:  $\beta$ , indicates regression coefficient; baPWV, brachial-ankle pulse wave velocity; SBP: systolic blood pressure.

Model 1 was adjusted for baseline baPWV.

Model 2 was adjusted for age, gender, education level, smoking status, alcohol drinking status, physical activity, baseline baPWV, BMI, MAP, FBG, and TC.

Supplementary Table S4. Associations of SBP trajectories with baseline baPWV stratified by gender.

| Trajectory patterns       | No. of participants | Model 1             |         | Model 2             |         |
|---------------------------|---------------------|---------------------|---------|---------------------|---------|
|                           |                     | β (95% CI)          | P-value | β (95% CI)          | P-value |
| Male                      |                     |                     |         |                     |         |
| Low-stable group          | 6,945               | Ref.                |         | Ref.                |         |
| Moderate-stable group     | 9,523               | 179.2 (169.3-189.1) | <0.001  | 111.1 (99.7-122.5)  | <0.001  |
| Elevated-decreasing group | 2,437               | 361.5 (346.7-376.2) | <0.001  | 195.6 (173.7-217.5) | <0.001  |
| Moderate-increasing group | 1,529               | 433.2 (415.5-450.9) | <0.001  | 273.0 (253.6-292.4) | <0.001  |
| Elevated-stable group     | 766                 | 539.6 (515.8-563.4) | <0.001  | 301.1 (269.4-332.7) | <0.001  |
| Female                    |                     |                     |         |                     |         |
| Low-stable group          | 3,370               | Ref.                |         | Ref.                |         |
| Moderate-stable group     | 3,779               | 211.1 (198.0-224.2) | <0.001  | 88.8 (74.6-103.0)   | <0.001  |
| Moderate-increasing group | 1,157               | 500.3 (481.5-519.2) | <0.001  | 229.0 (205.8-252.3) | <0.001  |
| Elevated-decreasing group | 488                 | 569.1 (542.3-595.9) | <0.001  | 211.2 (174.8-247.6) | <0.001  |
| Elevated-stable group     | 390                 | 766.9 (737.3-796.5) | <0.001  | 398.5 (359.8-437.2) | <0.001  |

Abbreviations:  $\beta$ , indicates regression coefficient; baPWV, brachial-ankle pulse wave velocity; SBP: systolic blood pressure.

Model 1 was unadjusted.

Model 2 was adjusted for age, gender, education level, smoking status, alcohol drinking status, physical activity, BMI, MAP, FBG, and TC.

Supplementary Table S5. Associations of SBP trajectories with baPWV progression stratified by gender.

| Trajectory patterns       | No. of participants | Model 1          |         | Model 2          |         |
|---------------------------|---------------------|------------------|---------|------------------|---------|
|                           |                     | β (95% CI)       | P-value | β (95% CI)       | P-value |
| Male                      |                     |                  |         |                  |         |
| Low-stable group          | 2,720               | Ref.             |         | Ref.             |         |
| Moderate-stable group     | 4,087               | 21.6 (14.5-28.7) | <0.001  | 18.0 (10.6-25.3) | <0.001  |
| Elevated-decreasing group | 1,036               | 52.5 (39.4-65.7) | <0.001  | 44.2 (30.6-57.7) | <0.001  |
| Moderate-increasing group | 621                 | 64.5 (47.2-81.9) | <0.001  | 54.7 (43.4-66.0) | <0.001  |
| Elevated-stable group     | 323                 | 65.3 (54.5-76.0) | <0.001  | 55.6 (37.7-73.5) | <0.001  |
| Female                    |                     |                  |         |                  |         |
| Low-stable group          | 1,981               | Ref.             |         | Ref.             |         |
| Moderate-stable group     | 2,327               | 29.2 (22.2-36.1) | <0.001  | 23.7 (16.5-30.9) | <0.001  |
| Moderate-increasing group | 697                 | 58.3 (47.3-69.4) | <0.001  | 41.4 (29.6-53.2) | <0.001  |
| Elevated-decreasing group | 220                 | 75.8 (58.8-92.8) | <0.001  | 51.6 (33.6-69.6) | <0.001  |
| Elevated-stable group     | 211                 | 62.9 (44.5-81.2) | <0.001  | 56.0 (36.9-75.0) | <0.001  |

Abbreviations:  $\beta$ , indicates regression coefficient; baPWV, brachial-ankle pulse wave velocity; SBP: systolic blood pressure.

Model 1 was adjusted for baseline baPWV.

Model 2 was adjusted for age, gender, education level, smoking status, alcohol drinking status, physical activity, baseline baPWV, BMI, MAP, FBG, and TC.

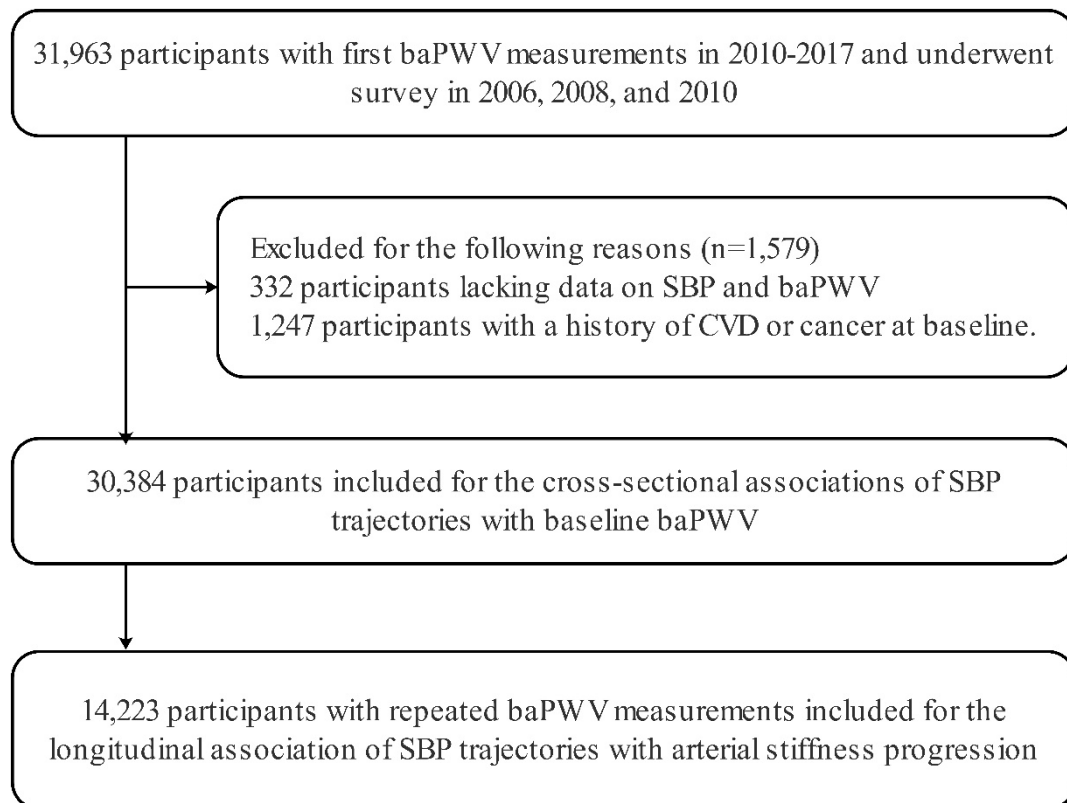

Supplementary Figure S1. Flowchart of the study population

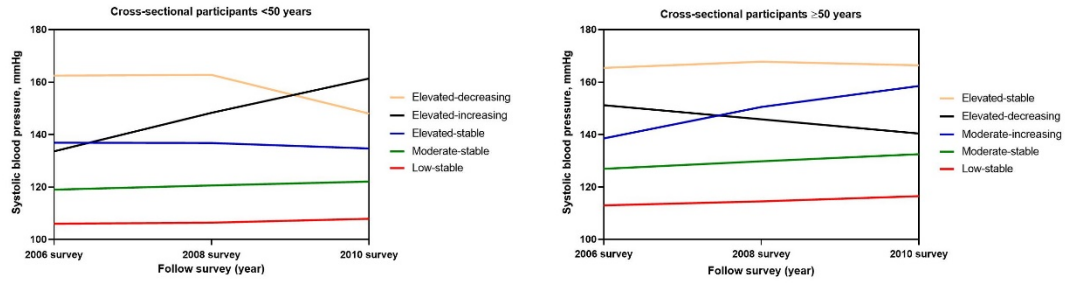

Supplementary Figure S2. SBP trajectory patterns for 30,384 participants with baseline baPWV during 2006–2010 stratified by age. SBP was classified into five groups according to the latent mixture modeling. The x-axis refers to the years of follow survey of the participants. The y-axis refers to the SBP concentrations of the participants.



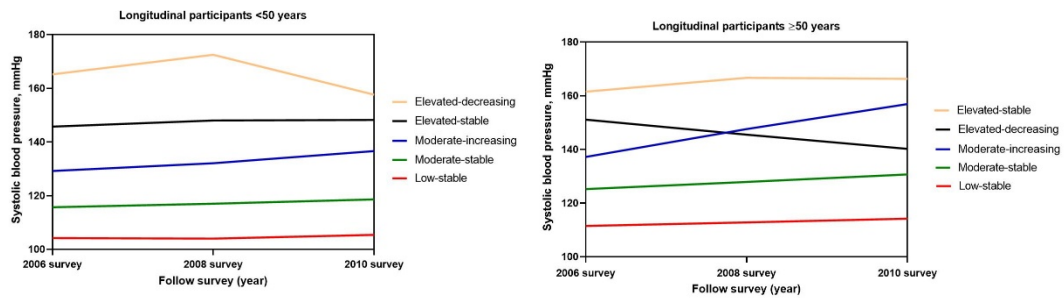

Supplementary Figure S3. SBP trajectory patterns for 14,223 participants with repeated baPWV during 2006–2010 stratified by age. SBP was classified into five groups according to the latent mixture modeling. The x-axis refers to the years of follow survey of the participants. The y-axis refers to the SBP concentrations of the participants.

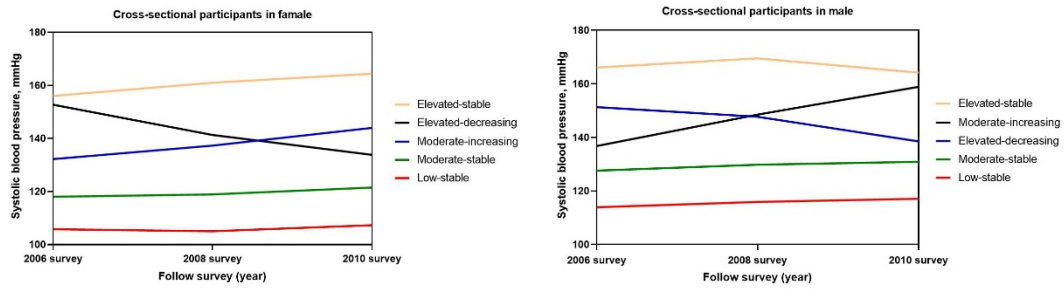

Supplementary Figure S4. SBP trajectory patterns for 30,384 participants with baseline baPWV during 2006–2010 stratified by gender. SBP was classified into five groups according to the latent mixture modeling. The x-axis refers to the years of follow survey of the participants. The y-axis refers to the SBP concentrations of the participants.

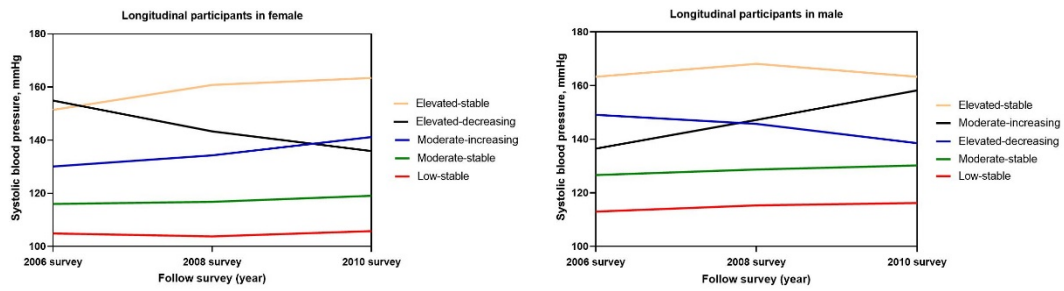

Supplementary Figure S5. SBP trajectory patterns for 14,223 participants with repeated baPWV during 2006–2010 stratified by gender. SBP was classified into five groups according to the latent mixture modeling. The x-axis refers to the years of follow survey of the participants. The y-axis refers to the SBP concentrations of the participants.
